# Supplementary material for: Genome-wide placental DNA methylation analysis of severely growth-discordant monochorionic twins reveals novel epigenetic targets for intrauterine growth restriction
Source: PubMed Central journal article supplement (PMC4915063; doi:10.1186/s13148-016-0238-x), 2016-06-21
Supplement: 13148_2016_238_MOESM1_ESM.pdf [file 13148_2016_238_MOESM1_ESM.pdf]

# Genome-wide placental DNA methylation analysis of severely growth-discordant monozygotic twins reveals novel epigenetic targets for intrauterine growth restriction

## Supplementary Materials

### SUPPLEMENTARY FIGURES

**Figure S1. Differentially methylated regions associated with IUGR.** The DMR is associated with the large difference between IUGR and Control, which can be either loss (green boxes, panels **A-B**) or gain (red boxes, panels **C-E**) of DNA methylation. Other genomic features, such as CpG islands, histone marks, DNase I hypersensitivity clusters and transcription factor binding sites are also shown. Visualization is provided by the UCSC Genome Browser.

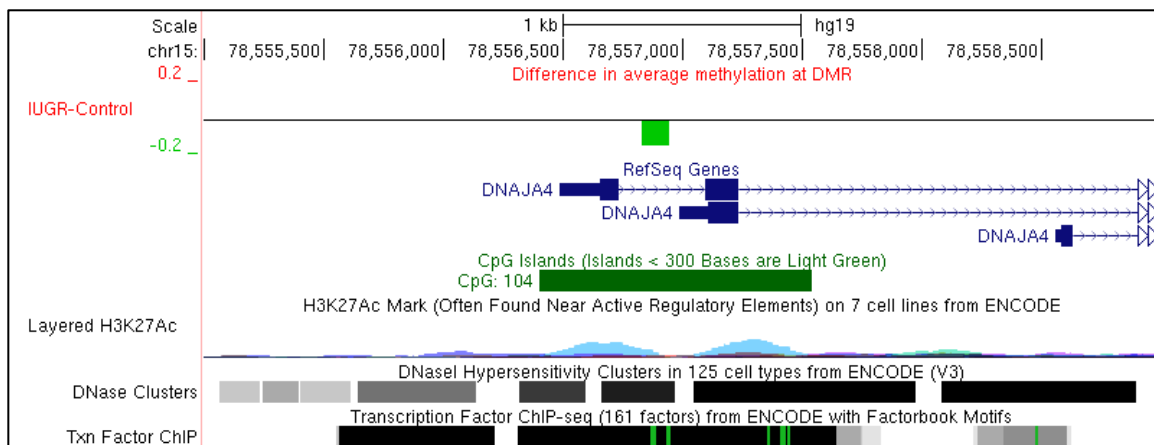

**A**

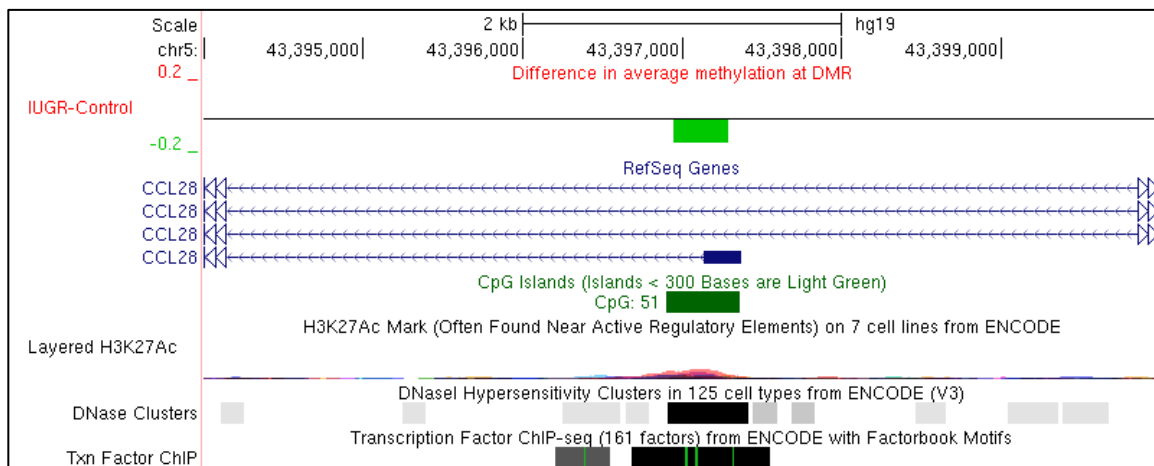

**B**

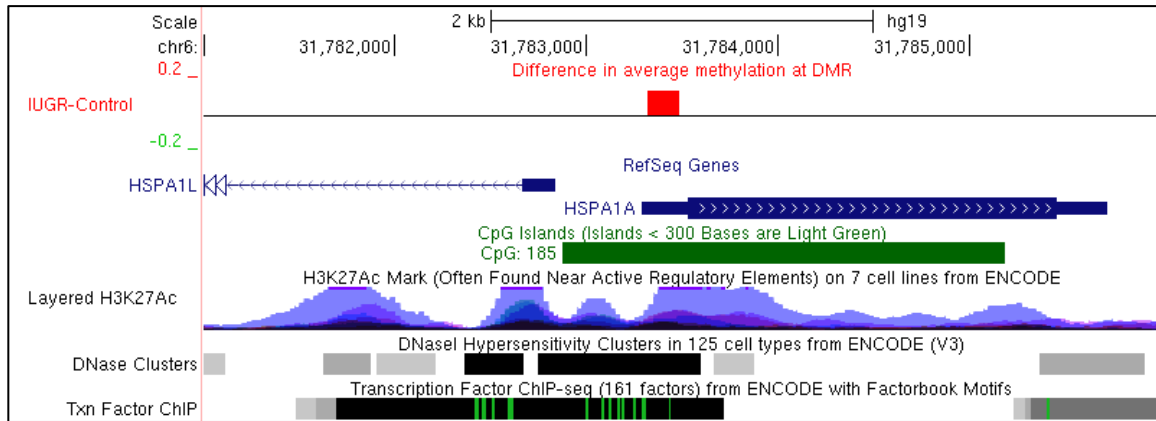

C

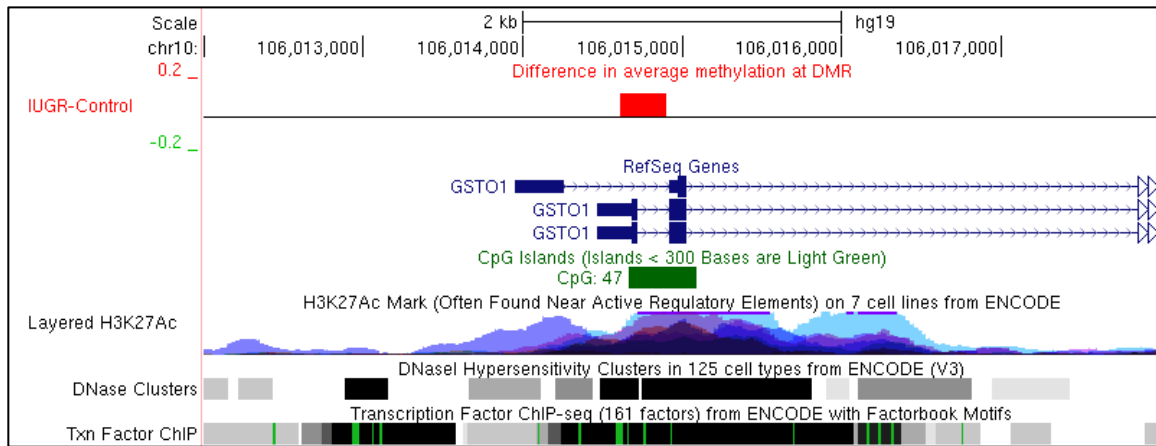

D

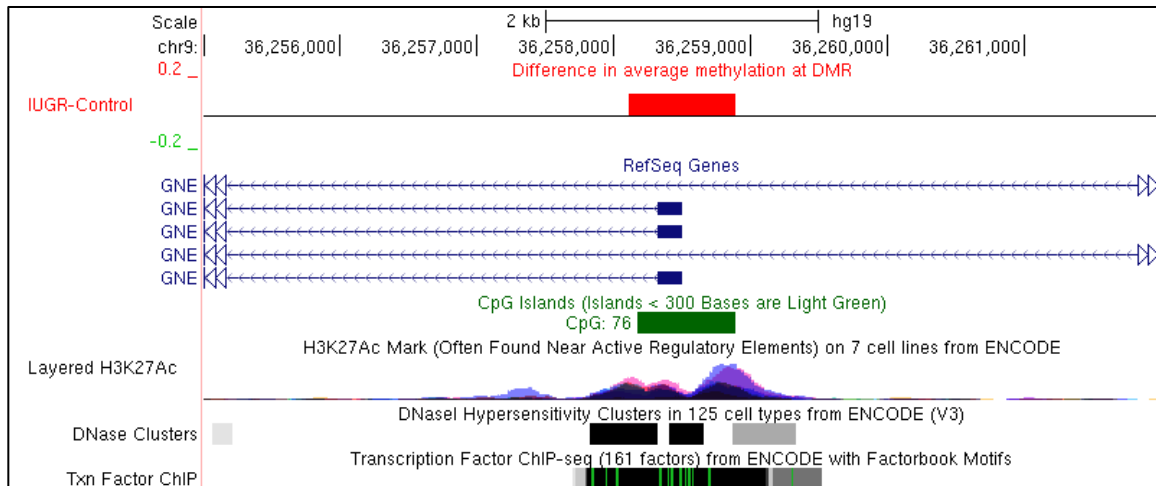

E

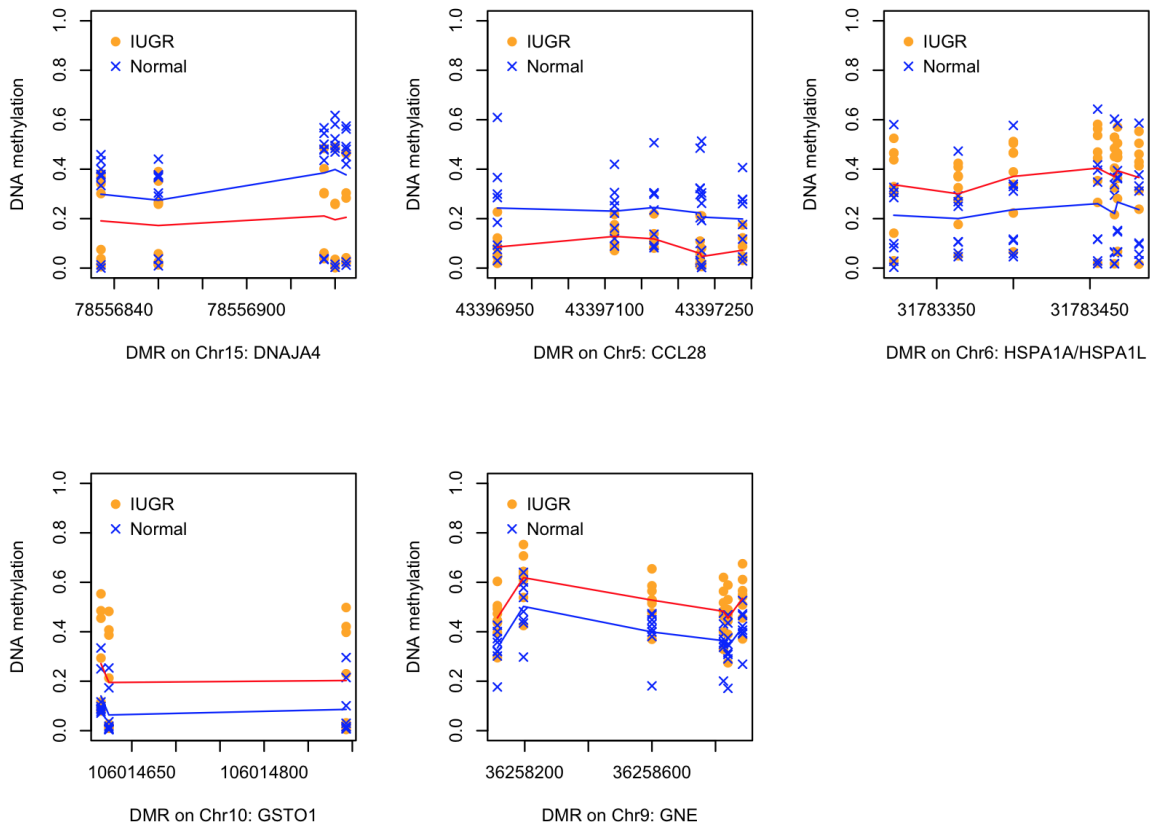

**Figure S2. DNAm changes in IUGR twins in CpGs comprising the detected differentially methylated regions (DMRs).** Methylation levels in IUGR twins (orange circles) and unaffected co-twins (blue crosses) are shown, arranged vertically for each CpG in the region spanning the candidate gene promoter. The mean methylation levels are shown for the IUGR cohort (red line) and controls (blue line). All CpGs exhibit methylation change above 10%, corresponding to the wider gap between the red and blue lines. Visualization is inspired by DMRcate software (Peters et al., 2015).

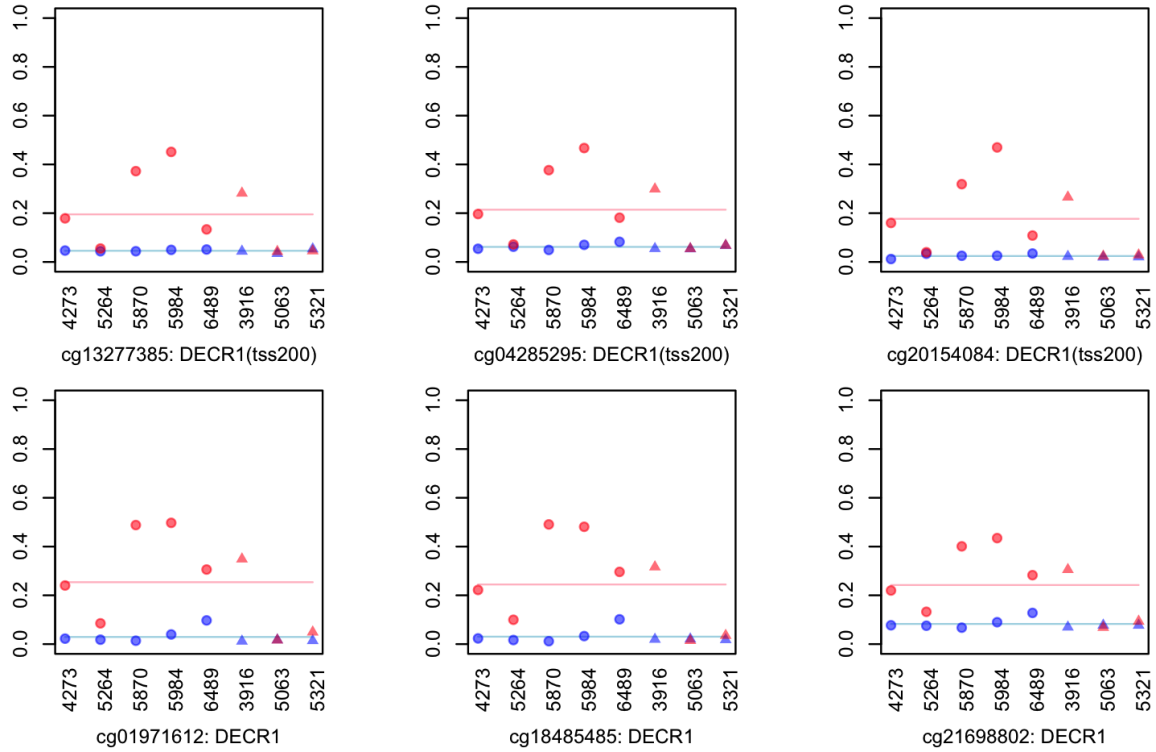

**Figure S3. CpGs that comprise the DMR in *DEC1* promoter region.** The X-axis shows 8 twin pairs, with the methylation level on the Y-axis for the healthy (blue) and the affected (red) twins. Horizontal lines show the average DNAm levels for the 8 healthy twins (blue lines) and 8 affected twins (red lines). The sex is indicated using shapes (male = circles, female = triangles). ‘tss200’ and ‘tss1500’ indicate the regions 200 bp or 1500 bp upstream of the transcription start site (according to Illumina annotation).

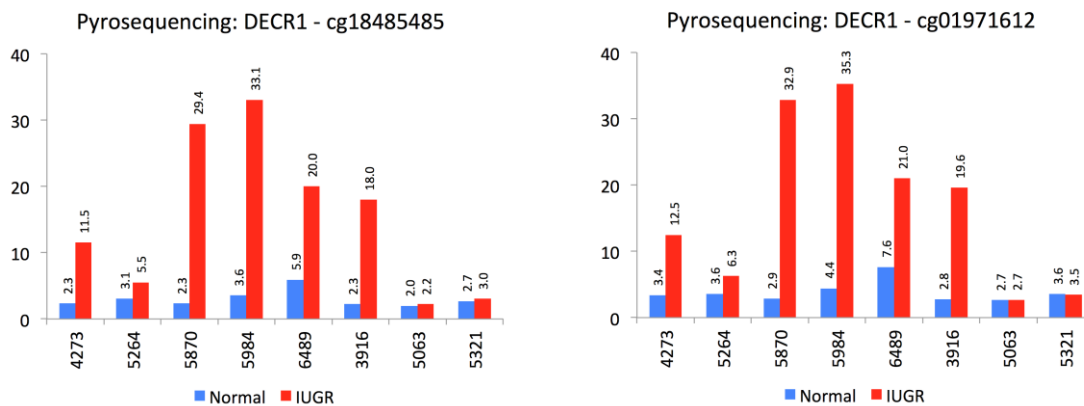

**Figure S4. Validation of *DEC1* methylation by pyrosequencing.** The pyrosequencing results for the top two *DEC1* CpG sites from the IUGR signature confirm the methylation patterns detected using the Infinium HumanMethylation450 array (compare to the **Supplementary Figure S3** above). X-axis shows twin samples, Y-axis shows the methylation percentage (beta values).

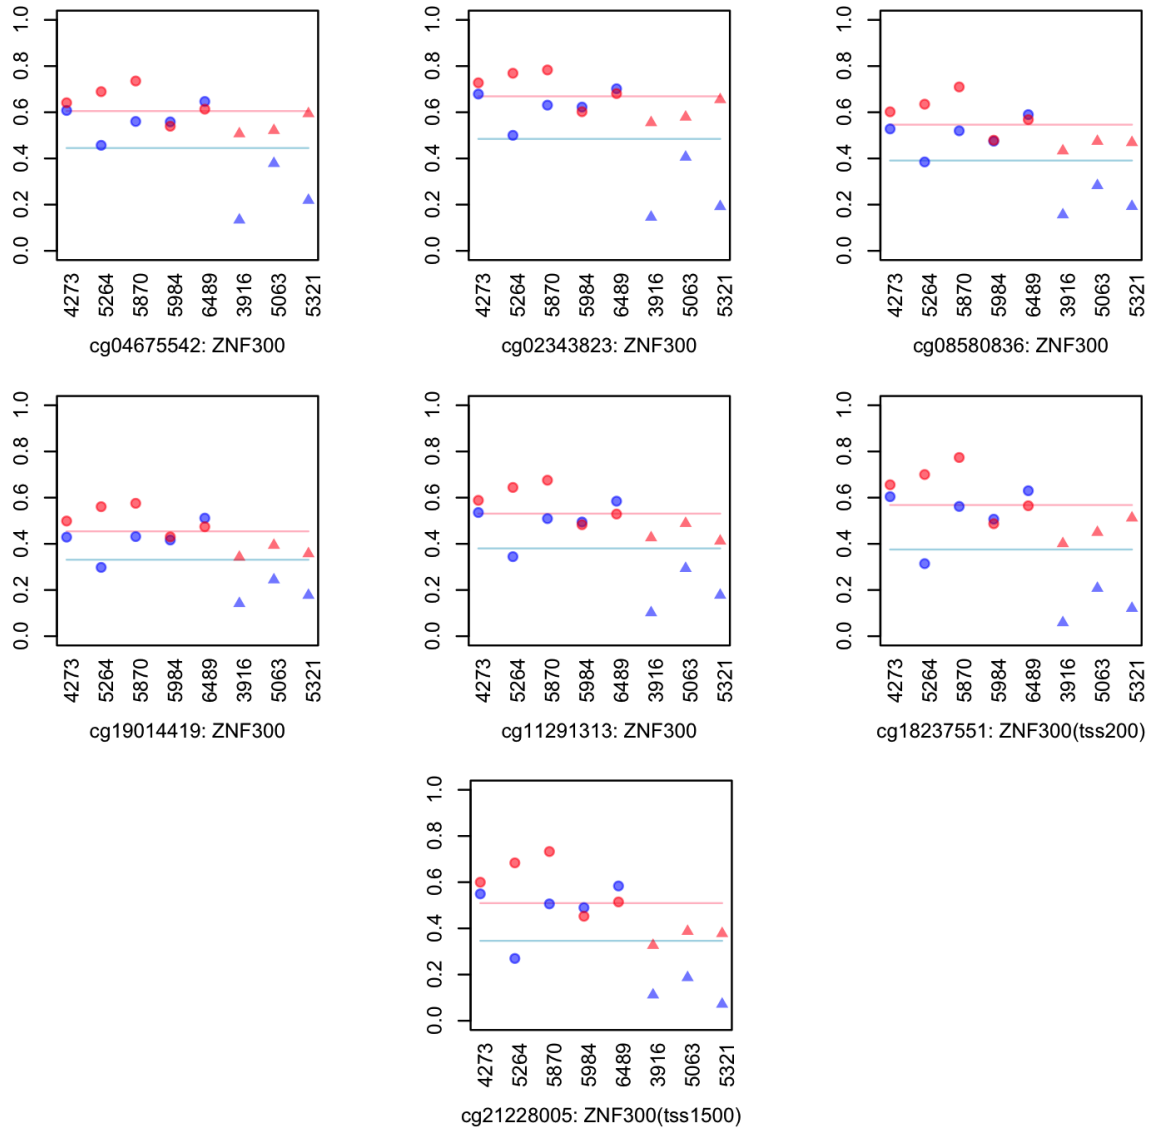

**Figure S5. CpGs that comprise the DMR in *ZNF300* promoter region.** The X-axis shows 8 twin pairs, with the methylation level on the Y-axis for the healthy (blue) and the affected (red) twins. Horizontal lines show the average DNAm levels for the 8 healthy twins (blue lines) and 8 affected twins (red lines). The sex is indicated using shapes (male = circles, female = triangles). ‘tss200’ and ‘tss1500’ indicate the regions 200 bp or 1500 bp upstream of the transcription start site (according to Illumina annotation).

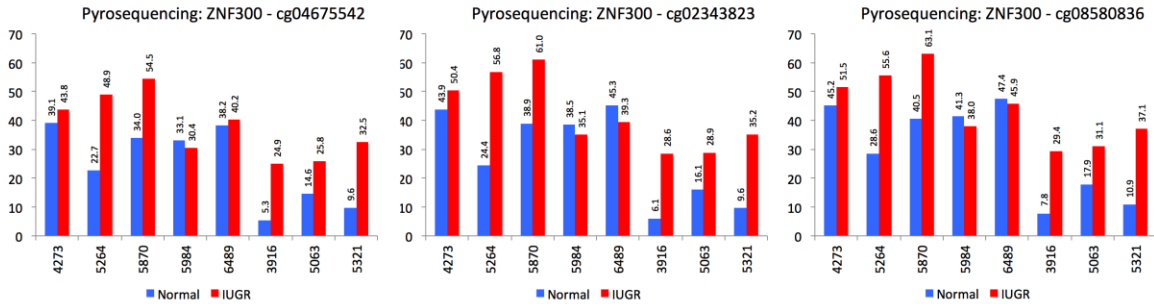

**Figure S6. Validation of *ZNF300* methylation by pyrosequencing.** The pyrosequencing results for three *ZNF300* CpG sites from the IUGR signature confirm the methylation patterns detected using the Infinium HumanMethylation450 array (compare to the **Supplementary Figure S5** above). X-axis shows twin samples, Y-axis shows the methylation percentage (beta values).

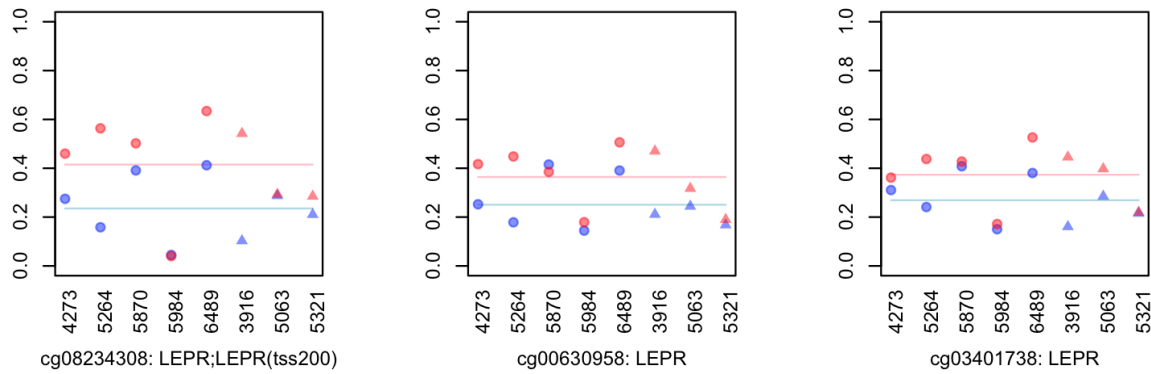

**Figure S7. CpGs that comprise the DMR in *LEPR* promoter region.** The X-axis shows 8 twin pairs, with the methylation level on the Y-axis for the healthy (blue) and the affected (red) twins. Horizontal lines show the average DNAm levels for the 8 healthy twins (blue lines) and 8 affected twins (red lines). The sex is indicated using shapes (male = circles, female = triangles). ‘tss200’ and ‘tss1500’ indicate the regions 200 bp or 1500 bp upstream of the transcription start site (according to Illumina annotation).

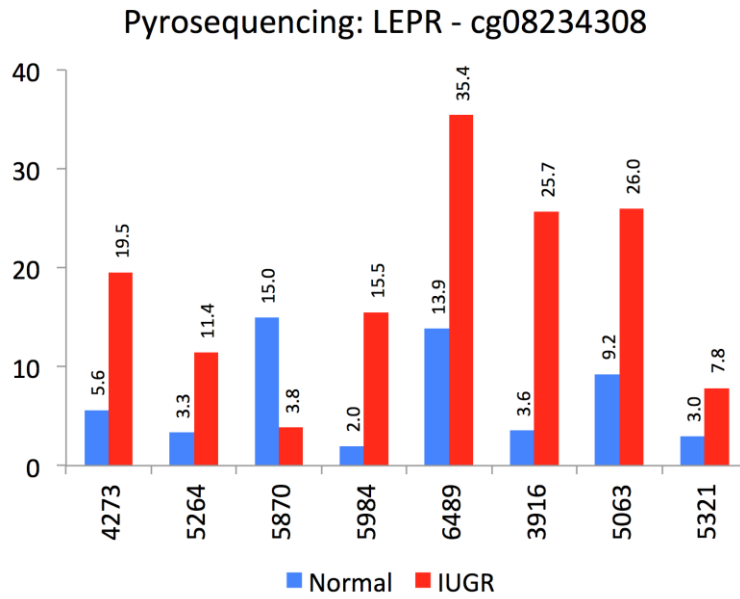

**Figure S8. Validation of *LEPR* methylation by pyrosequencing.** The pyrosequencing results for the top *LEPR* CpG site from the IUGR signature confirm the methylation patterns detected using the Infinium HumanMethylation450 array (compare to the **Supplementary Figure S7** above). X-axis shows twin samples, Y-axis shows the methylation percentage (beta values).

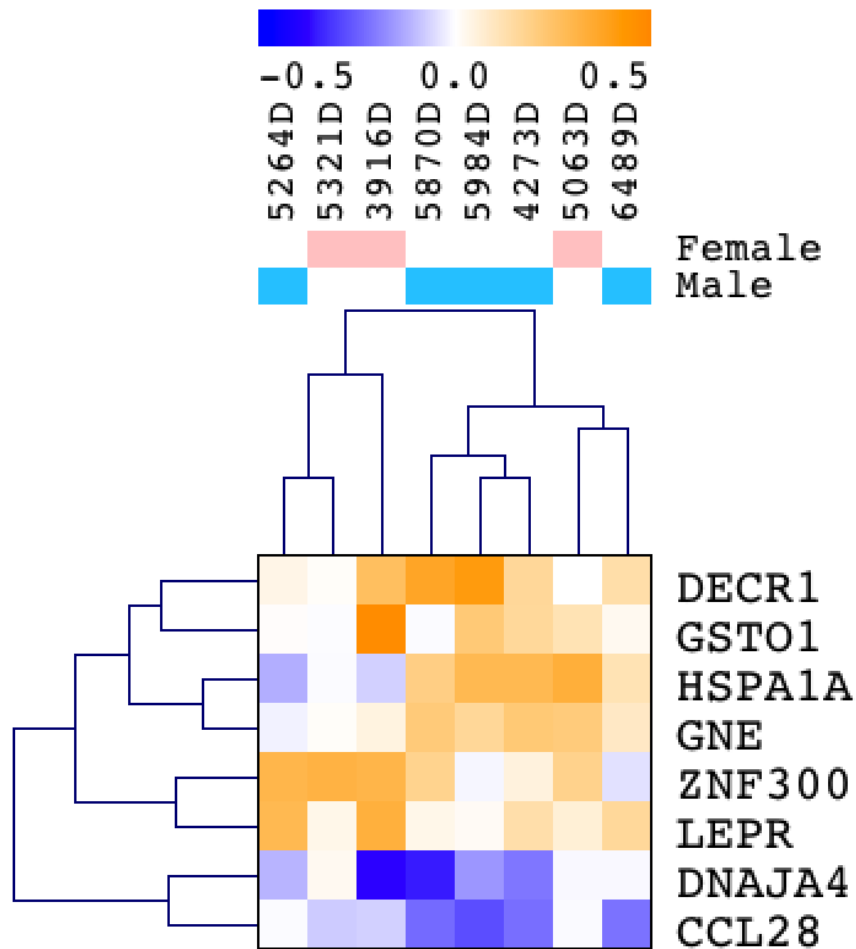

**Figure S9. Variation of DNA methylation changes in differentially methylated regions (DMR) across different twin pairs.** For each of the eight DMRs (heatmap rows) and 8 twin pairs (columns), the heatmap shows the average methylation change in IUGR across all CpGs that comprise the DMR. Each value of the heatmap represents a DNAm gain (orange) or loss (blue) in the IUGR twin of the pair, according to the color scale shown at the top.

#### SUPPLEMENTARY REFERENCES

- Peters, T. J., et al. (2015). 'De novo identification of differentially methylated regions in the human genome.' *Epigenetics & Chromatin*, 8, 6.
- Redline, R. W. (2008), 'Placental pathology: a systematic approach with clinical correlations', *Placenta*, 29 Suppl A, S86-91.
- Schrey, S., et al. (2013), 'Leptin is differentially expressed and epigenetically regulated across monozygotic twin placenta with discordant fetal growth', *Mol Hum Reprod*, 19 (11), 764-72.



## SUPPLEMENTAL TABLES

| Twin pair ID no. | Twin pair sex | Maternal age | Ethnicity            | Mode of conception | Larger twin birth weight (g) | Smaller twin birth weight (g) | Birth weight discordance (%) | Gestational age (weeks+day) |
|------------------|---------------|--------------|----------------------|--------------------|------------------------------|-------------------------------|------------------------------|-----------------------------|
| 3916D            | F             | 33           | Chinese              | Spont              | 2350                         | 1400                          | 40.4                         | 34+6                        |
| 4273D*           | M             | 29           | Indian sub-continent | Spont              | 1280                         | 680                           | 46.9                         | 28+5                        |
| 5063D*           | F             | 31           | Indian sub-continent | Spont              | 1910                         | 1440                          | 24.6                         | 33                          |
| 5264D*           | M             | 41           | Guyanese             | Spont              | 2640                         | 1720                          | 34.8                         | 34+3                        |
| 5321D*           | F             | 28           | Caucasian            | Spont              | 2480                         | 1550                          | 37.5                         | 34+1                        |
| 5870D            | M             | 31           | Caucasian            | Spont              | 2370                         | 1360                          | 42.6                         | 33+3                        |
| 5984D            | M             | 36           | Caucasian            | IVF                | 1000                         | 790                           | 21                           | 28+1                        |
| 6489D            | M             | 31           | Caucasian            | Spont              | 1280                         | 520                           | 59.4                         | 30+2                        |

**Table S1. Twin sample characteristics.** Spont = spontaneous conception; IVF = in vitro fertilization. Birth weight discordance calculated as: (larger twin weight – small twin weight)/larger twin weight. \* = twin pair from (Schrey et al. 2013)

| <b>Twin pair ID no.</b> | <b>Placental weight (g)</b> | <b>Placental weight percentile</b> | <b>Placental share of smaller twin (%)</b> | <b>Smaller twin's placental pathology</b>                                   | <b>Smaller twin's cord insertion</b> |
|-------------------------|-----------------------------|------------------------------------|--------------------------------------------|-----------------------------------------------------------------------------|--------------------------------------|
| 3916D                   | 637.5                       | 10-25 <sup>th</sup>                | 33                                         | Advanced villous maturity                                                   | Vel                                  |
| 4273D*                  | 430                         | 25-50 <sup>th</sup>                | 33                                         | Fetal vascular thrombosis, avascular villi, chronic villitis and deciduitis | Vel                                  |
| 5063D*                  | 361                         | <10 <sup>th</sup>                  | 50                                         | Advanced villous maturity                                                   | N                                    |
| 5264D*                  | 702.2                       | 25-50 <sup>th</sup>                | 25                                         | None                                                                        | N                                    |
| 5321D*                  | 721.9                       | 25-50 <sup>th</sup>                | 40                                         | None                                                                        | Vel                                  |
| 5870D                   | 680                         | 50 <sup>th</sup>                   | 15                                         | Focal infarction; cord overcoiling                                          | Vel                                  |
| 5984D                   | 274                         | <10 <sup>th</sup>                  | 50                                         | None                                                                        | N                                    |
| 6489D                   | 641                         | 75-98 <sup>th</sup>                | 25                                         | Infarction                                                                  | Vel                                  |

**Table S2. Placental characteristics of discordant MZ-MC twin pairs.** One-centimeter sections of placental parenchyma, cord and membrane from each twin were examined for pathological features and abnormal morphology (Redline 2008). Placental weights were plotted against norms for gestational age (Redline 2008). Cord insertion: N = normal, Vel = velamentous, \* = twin pair from (Schrey et al. 2013).

| <b>Inclusion Criteria</b>                                                                                                                                                                                                       |
|---------------------------------------------------------------------------------------------------------------------------------------------------------------------------------------------------------------------------------|
| Difference in birth weight $\geq 20\%$ for weight of larger twin                                                                                                                                                                |
| Informed consent of patient                                                                                                                                                                                                     |
| <b>Exclusion Criteria</b>                                                                                                                                                                                                       |
| Twins with evidence of twin-to-twin transfusion syndrome (TTTS) were excluded from this group (defined as either poly/oligohydramnios-sequence or absence of bladder in the small twin and enlarged bladder in the larger twin) |
| Twin anemia-polycythemia sequence (TAPS)                                                                                                                                                                                        |
| Monochorionicity not confirmed on pathology                                                                                                                                                                                     |
| Chromosomal abnormalities/ congenital syndromes                                                                                                                                                                                 |
| Fetal abnormalities                                                                                                                                                                                                             |
| Intrauterine fetal demise (IUFD) / neo-natal death (NND)                                                                                                                                                                        |
| Congenital infection                                                                                                                                                                                                            |
| Preeclampsia                                                                                                                                                                                                                    |
| Gestational or pre-existing diabetes                                                                                                                                                                                            |
| Placental tumors, such as chorangioma on pathology exam                                                                                                                                                                         |
| Fetal alcohol syndrome or drug abuse                                                                                                                                                                                            |
| Maternal disease not controlled for in both groups (asthma, flu, depression, celiac disease)                                                                                                                                    |

**Table S6.** Inclusion and exclusion criteria for the twin samples.
